# Supplementary material
Source: PubMed Central journal article supplement (PMC6724709)
Supplement: NIHMS1035977-supplement-Supplemental_Table_1.pdf [file NIHMS1035977-supplement-Supplemental_Table_1.pdf]

**Table S1. Sample Characteristics, By Cancer Status**

|                                   | Household Member<br>n (%) | Cancer<br>n (%)      | P-value |
|-----------------------------------|---------------------------|----------------------|---------|
| SF12 MCS mean (sd)                | 51.0 (10.2)               | 49.6 (11.1)          | <0.001  |
| Annual OOPC as % of HH Income     |                           |                      | 0.002   |
| OOP<=5% HH Income                 | 10761 (71.5%)             | 11136 (69.9%)        |         |
| OOP 5-10% HH Income               | 1893 (12.6%)              | 2199 (13.8%)         |         |
| OOP<10% HH Income                 | 2039 (13.5%)              | 2211 (13.9%)         |         |
| Age mean (sd)                     | 47.4 (19.3)               | 62.7 (15.5)          | <0.001  |
| Male Gender                       | 7859 (52.2%)              | 6247 (39.2%)         | <0.001  |
| White Race                        | 11106 (73.8%)             | 12520 (78.5%)        | <0.001  |
| Hispanic Ethnicity                | 3088 (20.5%)              | 2085 (13.1%)         | <0.001  |
| Census Region                     |                           |                      | 0.002   |
| Northeast                         | 2308 (15.3%)              | 2464 (15.5%)         |         |
| Midwest                           | 3086 (20.5%)              | 3453 (21.7%)         |         |
| South                             | 5875 (39.0%)              | 6069 (38.1%)         |         |
| West                              | 3652 (24.3%)              | 3601 (22.6%)         |         |
| Marital Status                    |                           |                      | <0.001  |
| Married                           | 7903 (52.5%)              | 8365 (52.5%)         |         |
| Formerly Married                  | 2202 (14.6%)              | 5900 (37.0%)         |         |
| Never Married                     | 4951 (32.9%)              | 1676 (10.5%)         |         |
| Education                         |                           |                      | <0.001  |
| Less than HS                      | 3094 (20.5%)              | 2936 (18.4%)         |         |
| GED/HS                            | 8898 (59.1%)              | 9060 (56.8%)         |         |
| More than HS                      | 2965 (19.7%)              | 3899 (24.5%)         |         |
| Family Size mean (sd)             | 3.1 (1.5)                 | 2.3 (1.3)            | <0.001  |
| Family Medical Costs mean (sd)    | 21271.2<br>(31287.0)      | 19278.3<br>(29687.3) | <0.001  |
| Insurance                         |                           |                      |         |
| Private Insurance                 | 6381 (42.4%)              | 4562 (28.6%)         | <0.001  |
| Medicare                          | 3837 (25.5%)              | 8861 (55.6%)         | <0.001  |
| Medicaid                          | 2493 (16.6%)              | 2891 (18.1%)         | <0.001  |
| Uninsured                         | 2697 (17.9%)              | 971 (6.1%)           | <0.001  |
| Body Mass Index                   | 28.1 (6.6)                | 28.4 (6.7)           | <0.001  |
| Count Heart conditions, mean (sd) | 1.3 (1.6)                 | 2.2 (1.8)            | <0.001  |
| Stroke                            | 704 (4.7%)                | 1782 (11.2%)         | <0.001  |
| Emphysema                         | 421 (2.8%)                | 1125 (7.1%)          | <0.001  |
| Diabetes                          | 1825 (12.1%)              | 3188 (20.0%)         | <0.001  |
| Arthritis                         | 4220 (28.1%)              | 8297 (52.1%)         | <0.001  |
| Asthma                            | 1411 (9.4%)               | 2001 (12.6%)         | <0.001  |

**MCS- Mental Component Score; OOPC- Out of pocket costs; HH-Household; HS-High school. P value from t test/chi2 of household member vs. cancer patient.**
