# Supplementary material
Source: PubMed Central journal article supplement (PMC6724709)
Supplement: NIHMS1035977-supplement-Supplemental_Table_2.pdf [file NIHMS1035977-supplement-Supplemental_Table_2.pdf]

**Table S2. Full Regression Results of the Association Between Mental Component Score and Financial Burden**

| <b>SF-12 MCS Score</b>                           | <b>Cancer Patients</b>      | <b>Household Members</b>    |
|--------------------------------------------------|-----------------------------|-----------------------------|
|                                                  | <b>B (95% CI)</b>           | <b>B (95% CI)</b>           |
| OOP Medical Costs as Percent HH Income (REF=<5%) |                             |                             |
| 5-10%                                            | <b>-1.30 (-1.95, -0.64)</b> | <b>-1.33 (-2.06, -0.59)</b> |
| >10%                                             | <b>-1.97 (-2.71, -1.23)</b> | <b>-1.87 (-2.66, -1.07)</b> |
| Age                                              | 0.06 (-0.06, 0.17)          | <b>-0.15 (-0.24, -0.06)</b> |
| Age <sup>2</sup>                                 | <b>0.001 (0.000, 0.001)</b> | <b>0.002 (0.001, 0.003)</b> |
| Male Gender                                      | <b>0.60 (0.10, 1.09)</b>    | <b>1.40 (0.86, 1.93)</b>    |
| White Race                                       | -0.51 (-1.13, 0.10)         | <b>-1.53 (-2.24, -0.83)</b> |
| Hispanic Ethnicity                               | -0.87 (-3.75, 2.02)         | -1.47 (-3.44, 0.51)         |
| Interaction: White*Hispanic                      | 0.82 (-2.22, 3.85)          | 2.55 (0.38, 4.72)           |
| Region (REF=Northeast)                           |                             |                             |
| Midwest                                          | -0.08 (-0.95, 0.80)         | 0.42 (-0.41, 1.25)          |
| South                                            | -0.67 (-1.46, 0.12)         | -0.18 (-1.01, 0.64)         |
| West                                             | -0.70 (-1.54, 0.13)         | -0.70 (-1.56, 0.16)         |
| Body Mass Index (BMI)                            | <b>0.05 (0.01, 0.09)</b>    | 0.00 (-0.04, 0.04)          |
| Comorbidities                                    |                             |                             |
| Heart disease                                    | <b>-0.26 (-0.40, -0.12)</b> | <b>-0.41 (-0.64, -0.18)</b> |
| Stroke                                           | <b>-2.55 (-3.44, -1.65)</b> | <b>-2.16 (-3.56, -0.75)</b> |
| Emphysema                                        | <b>-1.25 (-2.27, -0.23)</b> | -1.38 (-2.93, 0.17)         |
| Diabetes                                         | <b>-0.77 (-1.45, -0.08)</b> | <b>-1.43 (-2.32, -0.54)</b> |
| Arthritis                                        | <b>-1.41 (-1.92, -0.91)</b> | <b>-1.11 (-1.77, -0.46)</b> |
| Asthma                                           | <b>-1.20 (-1.95, -0.46)</b> | <b>-0.90 (-1.73, -0.06)</b> |
| Marital Status (REF=Married)                     |                             |                             |
| Formerly Married                                 | <b>-1.86 (-2.46, -1.25)</b> | <b>-3.67 (-4.52, -2.82)</b> |
| Never Married                                    | <b>-1.43 (-2.39, -0.48)</b> | -0.47 (-1.23, 0.30)         |
| Education (REF=No HS)                            |                             |                             |
| GED/HS                                           | <b>1.02 (0.20, 1.84)</b>    | <b>0.95 (0.10, 1.80)</b>    |
| Greater than HS                                  | <b>1.83 (0.96, 2.69)</b>    | <b>1.19 (0.26, 2.12)</b>    |
| Family Size                                      | <b>-0.28 (-0.54, -0.02)</b> | <b>-0.24 (-0.45, -0.03)</b> |
| Family Medical Costs (*10000)                    | <b>-0.30 (-0.40, -0.02)</b> | <b>-0.10 (-0.20, 0.00)</b>  |
| Medicare                                         | 0.09 (-0.76, 0.93)          | <b>-1.09 (-2.04, -0.13)</b> |
| Medicaid                                         | <b>-5.58 (-6.36, -4.79)</b> | <b>-2.94 (-3.81, -2.07)</b> |
| Uninsured                                        | <b>-3.51 (-4.98, -2.03)</b> | <b>-2.22 (-3.06, -1.38)</b> |
| Year (REF=2008)                                  |                             |                             |
| Year 2009                                        | 0.17 (-0.46, 0.79)          | 0.03 (-0.71, 0.77)          |
| Year 2010                                        | -0.04 (-0.82, 0.74)         | 0.38 (-0.43, 1.2)           |
| Year 2011                                        | -0.18 (-0.89, 0.53)         | 0.10 (-0.77, 0.97)          |
| Year 2012                                        | <b>-0.82 (-1.63, -0.01)</b> | 0.43 (-0.40, 1.26)          |
| Year 2013                                        | 0.54 (-0.31, 1.38)          | 0.83 (-0.10, 1.76)          |
| Year 2014                                        | 0.62 (-0.22, 1.46)          | 1.15 (0.17, 2.14)           |
| Year 2015                                        | 0.91 (0.11, 1.71)           | 0.60 (-0.36, 1.56)          |
| Year 2016                                        | 0.86 (0.02, 1.70)           | 0.13(-0.75, 1.02)           |
| Constant                                         | 47.67 (43.85, 51.48)        | 55.88 (53.05, 58.7)         |
