# Supplementary material
Source: PubMed Central journal article supplement (PMC6724709)
Supplement: NIHMS1035977-supplement-Supplemental_Table_3.pdf [file NIHMS1035977-supplement-Supplemental_Table_3.pdf]

**Table S3. Adjusted SF-12 MCS For Cancer and Household Members, by Financial Burden Level**

|                                                                                                                                                                                                         | Cancer     | Household Members |
|---------------------------------------------------------------------------------------------------------------------------------------------------------------------------------------------------------|------------|-------------------|
| All Insurance Types                                                                                                                                                                                     |            |                   |
| Low                                                                                                                                                                                                     | 49.9 (0.2) | 51.8 (0.2)        |
| Medium                                                                                                                                                                                                  | 48.6 (0.4) | 50.5 (0.4)        |
| High                                                                                                                                                                                                    | 47.9 (0.4) | 49.9 (0.4)        |
| Medicare                                                                                                                                                                                                |            |                   |
| Low                                                                                                                                                                                                     | 42.7 (1.9) | 47.7 (1.0)        |
| Medium                                                                                                                                                                                                  | 42.2 (1.9) | 46.0 (1.1)        |
| High                                                                                                                                                                                                    | 41.4 (2.0) | 45.8 (1.1)        |
| Medicaid                                                                                                                                                                                                |            |                   |
| Low                                                                                                                                                                                                     | 45.8 (0.6) | 48.3 (0.6)        |
| Medium                                                                                                                                                                                                  | 44.2 (1.0) | 47.6 (1.2)        |
| High                                                                                                                                                                                                    | 45.9 (1.3) | 47.4 (1.2)        |
| Private only                                                                                                                                                                                            |            |                   |
| Low                                                                                                                                                                                                     | 52.1 (0.4) | 52.9 (0.3)        |
| Medium                                                                                                                                                                                                  | 50.4 (0.6) | 51.7 (0.4)        |
| High                                                                                                                                                                                                    | 50.0 (0.7) | 51.4 (0.6)        |
| Uninsured                                                                                                                                                                                               |            |                   |
| Low                                                                                                                                                                                                     | 48.6 (1.1) | 49.7 (0.6)        |
| Medium                                                                                                                                                                                                  | 44.2 (1.8) | 48.7 (1.0)        |
| High                                                                                                                                                                                                    | 44.9 (1.4) | 46.7 (1.0)        |
| *MCS=Mental Health Component Score; standard error in parentheses<br>Financial Burden is defined as Percent of Household Income Spent on Out-of-Pocket Medical Costs (low=<5%; medium=5-10%; high=>10%) |            |                   |
